# Supplementary material for: Identification of a novel immune infiltration-related gene signature, MCEMP1, for coronary artery disease
Source: PeerJ journal article supplement (doi:10.7717/peerj.18135), 2024-09-25
Supplement: MIQE_checklist.xls [file MIQE_checklist.xls]

## Sheet: Sheet1
ITEM TO CHECK	IMPORTANCE	CHECKLIST
EXPERIMENTAL DESIGN
Definition of experimental and control groups	E	page5-7, line 114-175
Number within each group	E	NA
Assay carried out by core lab or investigator's lab?	D	investigator's lab
Acknowledgement of authors' contributions	D	page 13, line 359-362
SAMPLE
Description	E	NA
Volume/mass of sample processed	D	NA
Microdissection or macrodissection	E	NA
Processing procedure	E	NA
If frozen - how and how quickly?	E	NA
If fixed - with what, how quickly?	E	NA
Sample storage conditions and duration (especially for FFPE samples)	E	NA
NUCLEIC ACID EXTRACTION
Procedure and/or instrumentation	E	page 5-7, line 114-175
Name of kit and details of any modifications	E	page 5-7, line 114-175
Source of additional reagents used	D	page 5-7, line 114-175
Details of DNase or RNAse treatment	E	page 6, line 148-158
Contamination assessment (DNA or RNA)	E	page 6, line 148-158
Nucleic acid quantification	E	page 6, line 148-158
Instrument and method	E	page 6, line 148-158
Purity (A260/A280)	D	page 6, line 148-158
Yield	D	page 6, line 148-158
RNA integrity method/instrument	E	page 6, line 148-158
RIN/RQI or Cq of 3' and 5' transcripts	E	page 6, line 148-158
Electrophoresis traces	D	page 6, line 148-158
Inhibition testing (Cq dilutions, spike or other)	E	page 6, line 148-158
REVERSE TRANSCRIPTION
Complete reaction conditions	E	page 6, line 148-158
Amount of RNA and reaction volume	E	page 6, line 148-158
Priming oligonucleotide (if using GSP) and concentration	E	page 6, line 148-158
Reverse transcriptase and concentration	E	page 6, line 148-158
Temperature and time	E	page 6, line 148-158
Manufacturer of reagents and catalogue numbers	D	page 6, line 148-158
Cqs with and without RT	D*	page 6, line 148-158
Storage conditions of cDNA	D	page 6, line 148-158
qPCR TARGET INFORMATION
If multiplex, efficiency and LOD of each assay.	E	page 6, line 148-158
Sequence accession number	E	page 6, line 148-158
Location of amplicon	D	page 6, line 148-158
Amplicon length	E	page 6, line 148-158
In silico specificity screen (BLAST, etc)	E	page 6, line 148-158
Pseudogenes, retropseudogenes or other homologs?	D	page 6, line 148-158
Sequence alignment	D	page 6, line 148-158
Secondary structure analysis of amplicon	D	page 6, line 148-158
Location of each primer by exon or intron (if applicable)	E	page 6, line 148-158
What splice variants are targeted?	E	page 6, line 148-158
qPCR OLIGONUCLEOTIDES
Primer sequences	E	page 6, line 148-158
RTPrimerDB Identification Number	D	page 6, line 148-158
Probe sequences	D**	page 6, line 148-158
Location and identity of any modifications	E	page 6, line 148-158
Manufacturer of oligonucleotides	D	page 6, line 148-158
Purification method	D	page 6, line 148-158
qPCR PROTOCOL
Complete reaction conditions	E	Yes
Reaction volume and amount of cDNA/DNA	E	Yes
Primer, (probe), Mg++ and dNTP concentrations	E	Yes
Polymerase identity and concentration	E	Yes
Buffer/kit identity and manufacturer	E	Yes
Exact chemical constitution of the buffer	D	Yes
Additives (SYBR Green I, DMSO, etc.)	E	Yes
Manufacturer of plates/tubes and catalog number	D	Yes
Complete thermocycling parameters	E	Yes
Reaction setup (manual/robotic)	D	Yes
Manufacturer of qPCR instrument	E	Yes
qPCR VALIDATION
Evidence of optimisation (from gradients)	D	Yes
Specificity (gel, sequence, melt, or digest)	E	Yes
For SYBR Green I, Cq of the NTC	E	Yes
Standard curves with slope and y-intercept	E	Yes
PCR efficiency calculated from slope	E	Yes
Confidence interval for PCR efficiency or standard error	D	Yes
r2 of standard curve	E	Yes
Linear dynamic range	E	Yes
Cq variation at lower limit	E	Yes
Confidence intervals throughout range	D	Yes
Evidence for limit of detection	E	Yes
If multiplex, efficiency and LOD of each assay.	E	Yes
DATA ANALYSIS
qPCR analysis program (source, version)	E	Yes
Cq method determination	E	Yes
Outlier identification and disposition	E	Yes
Results of NTCs	E	Yes
Justification of number and choice of reference genes	E	Yes
Description of normalisation method	E	Yes
Number and concordance of biological replicates	D	Yes
Number and stage (RT or qPCR) of technical replicates	E	Yes
Repeatability (intra-assay variation)	E	Yes
Reproducibility (inter-assay variation, %CV)	D	Yes
Power analysis	D	Yes
Statistical methods for result significance	E	Yes
Software (source, version)	E	Yes
Cq or raw data submission using RDML	D	Yes
Table 1. MIQE checklist for authors, reviewers and editors. All essential information (E) must be submitted with the manuscript. Desirable
information (D) should be submitted if available. If using primers obtained from RTPrimerDB, information on qPCR target, oligonucleotides,
protocols and validation is available from that source.
*: Assessing the absence of DNA using a no RT assay is essential when first extracting RNA. Once the sample has been validated as
RDNA-free, inclusion of a no-RT control is desirable, but no longer essential.
**: Disclosure of the probe sequence is highly desirable and strongly encouraged. However, since not all commercial pre-designed assay
vendors provide this information, it cannot be an essential requirement. Use of such assays is advised against.
