# Supplementary material for: Identification of a novel immune infiltration-related gene signature, MCEMP1, for coronary artery disease
Source: PeerJ journal article supplement (doi:10.7717/peerj.18135), 2024-09-25
Supplement: raw_data.zip [file raw_data.zip]

For Research Use Only

# DIRC2 Polyclonal antibody

Catalog Number: 26750-1-AP

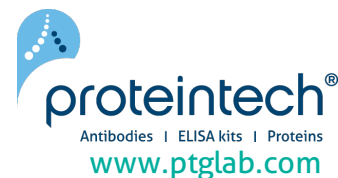

## Basic Information

Catalog Number:

26750-1-AP

Size:

900 µg/ml

Source:

Rabbit

Isotype:

IgG

Immunogen Catalog Number:

AG24687

GenBank Accession Number:

BC039821

GeneID (NCBI):

84925

UNIPROT ID:

Q96SL1

Full Name:

disrupted in renal carcinoma 2

Calculated MW:

478 aa, 52 kDa

Observed MW:

48-52 kDa

Purification Method:

Antigen affinity purification

Recommended Dilutions:

WB 1:500-1:2000

## Applications

Tested Applications:

WB, ELISA

Species Specificity:

human, mouse

Positive Controls:

WB : MCF-7 cells, PC-3 cells

## Background Information

### Storage

Storage:

Store at -20°C. Stable for one year after shipment.

Storage Buffer:

PBS with 0.02% sodium azide and 50% glycerol pH 7.3.

Aliquoting is unnecessary for -20°C storage

For technical support and original validation data for this product please contact:

T: 4006900926

E: [Proteintech-CN@ptglab.com](mailto:Proteintech-CN@ptglab.com)

W: [ptgcn.com](http://ptgcn.com)

This product is exclusively available under Proteintech Group brand and is not available to purchase from any other manufacturer.

## Selected Validation Data

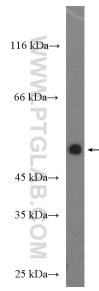

MCF-7 cells were subjected to SDS PAGE followed by western blot with 26750-1-AP (DIRC2 Antibody) at dilution of 1:1000 incubated at room temperature for 1.5 hours.
