# Supplementary material for: Identification of a novel immune infiltration-related gene signature, MCEMP1, for coronary artery disease
Source: PeerJ journal article supplement (doi:10.7717/peerj.18135), 2024-09-25
Supplement: raw_data.zip [file raw_data.zip]

# ICAM1 (4F5) Mouse mAb

Cat.#: 200350-F12 Size: 20µl 50µl 100µl

|                    |                                                                                                                                                                                                                                                       |
|--------------------|-------------------------------------------------------------------------------------------------------------------------------------------------------------------------------------------------------------------------------------------------------|
| Gene ID            | 3383                                                                                                                                                                                                                                                  |
| SwissProt ID       | P05362                                                                                                                                                                                                                                                |
| Gene Name          | ICAM1                                                                                                                                                                                                                                                 |
| Alternative Names  | ICAM1; Intercellular adhesion molecule 1; ICAM-1; Major group rhinovirus receptor; CD antigen CD54                                                                                                                                                    |
| Background         | ICAM1 a type I membrane protein of the immunoglobulin superfamily. Is a ligand for the leukocyte adhesion LFA-1 protein (Integrin alpha-L/beta-2) and a Rhinovirus receptor. Typically expressed on endothelial cells and cells of the immune system. |
| Research Field     | Immunology                                                                                                                                                                                                                                            |
| Product Categories | Primary antibody                                                                                                                                                                                                                                      |
| Host               | Mouse                                                                                                                                                                                                                                                 |
| Reactivity         | Human                                                                                                                                                                                                                                                 |
| Application        | WB,ICC/IF                                                                                                                                                                                                                                             |
| Dilution Ratio     | WB: 1/500-1/1000 IF: 1/50-1/200                                                                                                                                                                                                                       |
| Molecular Weight   | Calculated MW: 58 kDa; Observed MW: 96 kDa                                                                                                                                                                                                            |
| Clonality          | Monoclonal Antibody                                                                                                                                                                                                                                   |
| Clonality No.      | 4F5-F9-F12                                                                                                                                                                                                                                            |
| Isotype            | IgG2b                                                                                                                                                                                                                                                 |
| Immunogen          | Purified recombinant human CD54(ICAM-1) protein fragments expressed in E.coli.                                                                                                                                                                        |
| Purification       | Affinity Purified                                                                                                                                                                                                                                     |
| Conjugation        | Unconjugated                                                                                                                                                                                                                                          |
| Modification       | Unmodified                                                                                                                                                                                                                                            |
| Form               | Liquid                                                                                                                                                                                                                                                |
| Buffer System      | Liquid in PBS containing 50% glycerol, 0.5% BSA and 0.02% sodium azide, pH 7.3.                                                                                                                                                                       |

## Storage

Store at 4°C short term. Aliquot and store at -20°C long term. Avoid freeze/thaw cycles.

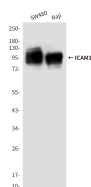

Western blot analysis of CD54(ICAM1) in SW480 and Raji lysates using CD54(ICAM1) antibody.

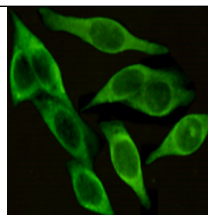

Immunocytochemistry analysis of ICAM1 (4F5) in SW480 using CD54(ICAM1) antibody.
