# Supplementary material for: Identification of a novel immune infiltration-related gene signature, MCEMP1, for coronary artery disease
Source: PeerJ journal article supplement (doi:10.7717/peerj.18135), 2024-09-25
Supplement: Suppl_Tbale_1.docx [file Suppl_Tbale_1.docx]

**Suppl_Tbale 1**. DEGs between CAD samples and normal samples

| Gene name | logFC | AveExpr | t | P.Value | adj.P.Val | B |
| --- | --- | --- | --- | --- | --- | --- |
| HSDL2 | 1.068206 | 5.915772 | 6.801397 | 1.23E-09 | 5.77E-06 | 11.6549 |
| PGLYRP1 | 1.151877 | 6.717461 | 6.471756 | 5.42E-09 | 1.50E-05 | 10.26866 |
| DYSF | 1.246241 | 7.405419 | 5.747421 | 1.30E-07 | 0.000104 | 7.30636 |
| CAMP | 2.950715 | 7.845152 | 5.610491 | 2.33E-07 | 0.000144 | 6.76219 |
| MMP9 | 1.597756 | 7.185241 | 5.473045 | 4.17E-07 | 0.000179 | 6.221848 |
| ROPN1L | 1.048968 | 6.131253 | 5.42475 | 5.10E-07 | 0.000197 | 6.033453 |
| ACSL1 | 1.164677 | 6.745267 | 5.187786 | 1.36E-06 | 0.000301 | 5.120776 |
| DENND3 | 1.023902 | 6.433595 | 4.826505 | 5.85E-06 | 0.00073 | 3.770043 |
| RALB | 1.288936 | 7.920201 | 4.813088 | 6.17E-06 | 0.000755 | 3.720906 |
| S100A12 | 1.78774 | 6.954741 | 4.751479 | 7.86E-06 | 0.000871 | 3.496254 |
| MCEMP1 | 1.103888 | 6.653604 | 4.729987 | 8.56E-06 | 0.000909 | 3.418272 |
| CDA | 1.107973 | 6.968684 | 4.670627 | 1.08E-05 | 0.00102 | 3.203947 |
| ARID3A | 1.163827 | 6.956961 | 4.532065 | 1.84E-05 | 0.001393 | 2.709854 |
| IRAK3 | 1.507964 | 6.338879 | 4.394851 | 3.10E-05 | 0.001809 | 2.229435 |
| LRG1 | 1.445254 | 6.941399 | 4.38388 | 3.23E-05 | 0.001839 | 2.191415 |
| FPR1 | 1.568839 | 9.385538 | 4.376023 | 3.33E-05 | 0.001878 | 2.164225 |
| KLHL21 | 1.367363 | 6.715257 | 4.204851 | 6.29E-05 | 0.002674 | 1.579519 |
| CTSG | 3.249601 | 9.241478 | 4.200185 | 6.40E-05 | 0.00268 | 1.563787 |
| GBA | 1.030173 | 6.336892 | 4.175812 | 7.00E-05 | 0.002866 | 1.481812 |
| MFN2 | 1.044981 | 6.245716 | 4.136441 | 8.08E-05 | 0.003129 | 1.350051 |
| CLEC4E | 1.052227 | 5.422122 | 4.130773 | 8.25E-05 | 0.003169 | 1.331149 |
| DIRC2 | 1.241119 | 6.000185 | 4.127359 | 8.35E-05 | 0.003196 | 1.319771 |
| B3GNTL1 | 1.001816 | 5.378236 | 4.044148 | 0.000113 | 0.003827 | 1.044413 |
| DUSP1 | 2.474235 | 9.754616 | 4.00432 | 0.00013 | 0.00414 | 0.913944 |
| PFKFB3 | 1.679061 | 6.19915 | 3.996646 | 0.000134 | 0.004203 | 0.888905 |
| PGM2 | 1.056033 | 5.824697 | 3.984963 | 0.000139 | 0.004319 | 0.850848 |
| XPO7 | 1.212516 | 6.346992 | 3.982983 | 0.00014 | 0.004322 | 0.844407 |
| PURA | 142.9333 | 349.9943 | 3.969937 | 0.000147 | 0.004418 | 0.802017 |
| LYN | 1.28521 | 9.024502 | 3.922699 | 0.000174 | 0.004922 | 0.649311 |
| RPL9 | -4.80893 | 7.639588 | -3.89045 | 0.000195 | 0.005308 | 0.545782 |
| SYK | 1.357854 | 7.264884 | 3.876632 | 0.000204 | 0.005452 | 0.501607 |
| CSTA | 1.380453 | 5.661036 | 3.765739 | 0.0003 | 0.007072 | 0.151046 |
| LCN2 | 1.04549 | 6.249574 | 3.69615 | 0.000381 | 0.008261 | -0.06526 |
| TES | -1.15666 | 4.964924 | -3.68394 | 0.000397 | 0.008423 | -0.1029 |
| FXR1 | 1.47515 | 6.716075 | 3.661017 | 0.000429 | 0.008833 | -0.17337 |
| SSH2 | 1.258967 | 8.008939 | 3.619745 | 0.000493 | 0.009597 | -0.29941 |
| ZNF281 | 1.788903 | 7.294249 | 3.604052 | 0.00052 | 0.009977 | -0.34706 |
| SLC35E3 | 1.115346 | 6.015711 | 3.548171 | 0.000627 | 0.011076 | -0.51551 |
| SLC35A4 | 2.964128 | 10.11822 | 3.538684 | 0.000647 | 0.011321 | -0.54392 |
| SLC39A1 | 1.202683 | 7.122355 | 3.526642 | 0.000673 | 0.011605 | -0.57989 |
| IL13RA1 | 1.556089 | 7.950673 | 3.517323 | 0.000694 | 0.011811 | -0.60767 |
| SORL1 | 2.335609 | 7.92997 | 3.483324 | 0.000776 | 0.012618 | -0.70856 |
| PHKA2 | 1.419638 | 7.081547 | 3.453155 | 0.000856 | 0.01342 | -0.79746 |
| CEACAM1 | 1.361067 | 5.533224 | 3.434952 | 0.000908 | 0.013966 | -0.85082 |
| RXRA | 4.774426 | 13.4835 | 3.435141 | 0.000908 | 0.013966 | -0.85027 |
| PPP1R15A | 1.067776 | 7.212413 | 3.37256 | 0.001111 | 0.015781 | -1.03211 |
| PROKR1 | -1.28148 | 4.092345 | -3.36183 | 0.00115 | 0.01614 | -1.06305 |
| FCAR | 1.012191 | 5.550307 | 3.317193 | 0.001326 | 0.017606 | -1.19087 |
| S100P | 1.331795 | 6.761602 | 3.300855 | 0.001397 | 0.018148 | -1.23733 |
| TDRD1 | 1.108723 | 6.124627 | 3.290785 | 0.001442 | 0.018437 | -1.26588 |
| TALDO1 | 1.283799 | 6.425689 | 3.274024 | 0.00152 | 0.019133 | -1.31325 |
| RTN3 | 1.105321 | 5.54269 | 3.265081 | 0.001563 | 0.019448 | -1.33845 |
| PELI1 | 1.01618 | 6.892774 | 3.261262 | 0.001582 | 0.019496 | -1.34919 |
| ROCK2 | 1.090194 | 6.494921 | 3.256889 | 0.001604 | 0.019656 | -1.36149 |
| FADD | 1.624082 | 6.6966 | 3.256831 | 0.001604 | 0.019656 | -1.36165 |
| GBE1 | 1.07392 | 5.864515 | 3.215853 | 0.001824 | 0.021345 | -1.4762 |
| C3orf20 | -1.27444 | 4.466895 | -3.18667 | 0.001996 | 0.022807 | -1.5571 |
| LY96 | 2.136985 | 7.722968 | 3.107522 | 0.002545 | 0.026808 | -1.77356 |
| SETD3 | 1.000691 | 5.848291 | 3.078398 | 0.00278 | 0.028208 | -1.85213 |
| C9orf72 | 1.025986 | 6.087386 | 3.062726 | 0.002915 | 0.028994 | -1.89416 |
| STYXL1 | 1.379955 | 6.324762 | 3.059832 | 0.00294 | 0.029136 | -1.90191 |
| CLIC1 | 1.122072 | 7.259515 | 2.984911 | 0.003678 | 0.033602 | -2.10033 |
| LILRA5 | 2.053727 | 6.846473 | 2.976076 | 0.003775 | 0.034169 | -2.12347 |
| WDFY2 | 2.257626 | 7.103099 | 2.954777 | 0.00402 | 0.035583 | -2.17902 |
| TEF | 2.360032 | 8.593755 | 2.954781 | 0.00402 | 0.035583 | -2.17901 |
| ZNF438 | 1.009465 | 5.927339 | 2.951674 | 0.004057 | 0.035786 | -2.18708 |
| LOC399900 | 1.491206 | 7.360622 | 2.884343 | 0.004938 | 0.040758 | -2.36041 |
| TLR5 | 2.983091 | 7.929446 | 2.880865 | 0.004988 | 0.041001 | -2.36927 |
| JTB | 1.160442 | 7.035566 | 2.863584 | 0.005243 | 0.04214 | -2.41319 |
| OSBPL8 | 1.563204 | 5.914587 | 2.838804 | 0.00563 | 0.044038 | -2.47578 |
| EDA | 6.008401 | 20.08005 | 2.810013 | 0.006112 | 0.046345 | -2.54794 |
| CFLAR | 2.308309 | 8.416819 | 2.790341 | 0.006463 | 0.048098 | -2.59689 |
| KCNJ2 | 1.075211 | 6.616469 | 2.782627 | 0.006606 | 0.048527 | -2.61601 |
